# Supplementary material for: Performance of ensemble streamflow forecasts under varied hydrometeorological conditions
Source: Copernicus journal article supplement (doi:10.5194/hess-21-5273-2017), 2017-10-19

Supplement of Hydrol. Earth Syst. Sci., 21, 5273–5291, 2017  
<https://doi.org/10.5194/hess-21-5273-2017-supplement>  
© Author(s) 2017. This work is distributed under  
the Creative Commons Attribution 3.0 License.

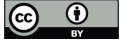

*Supplement of*

## **Performance of ensemble streamflow forecasts under varied hydrometeorological conditions**

**Harm-Jan F. Benninga et al.**

*Correspondence to:* Harm-Jan F. Benninga ([h.f.benninga@utwente.nl](mailto:h.f.benninga@utwente.nl))

The copyright of individual parts of the supplement might differ from the CC BY 3.0 License.

# Supplement Figure 1: Rank histograms of the streamflow forecasts

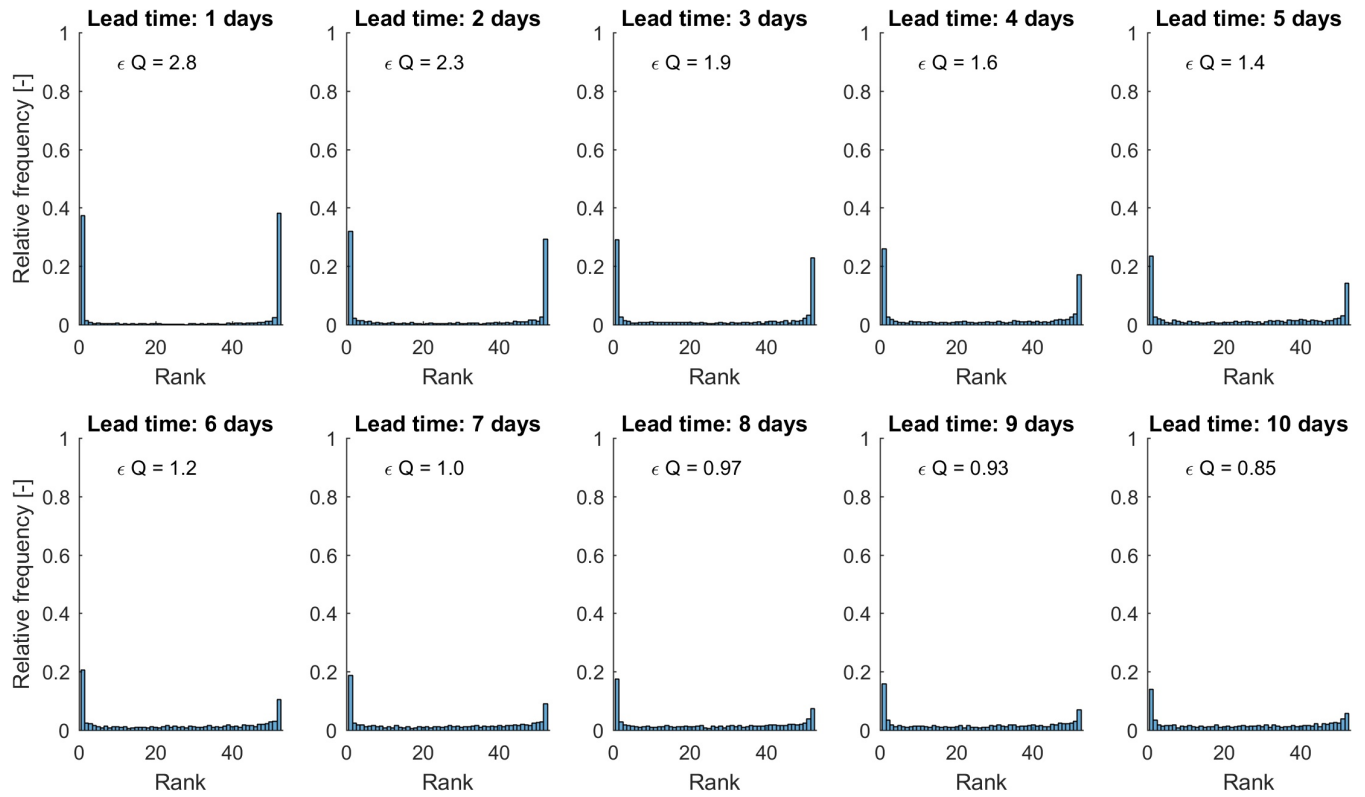

# Supplement Figure 2: Rank histograms of the streamflow forecasts for the different flow forecast categories

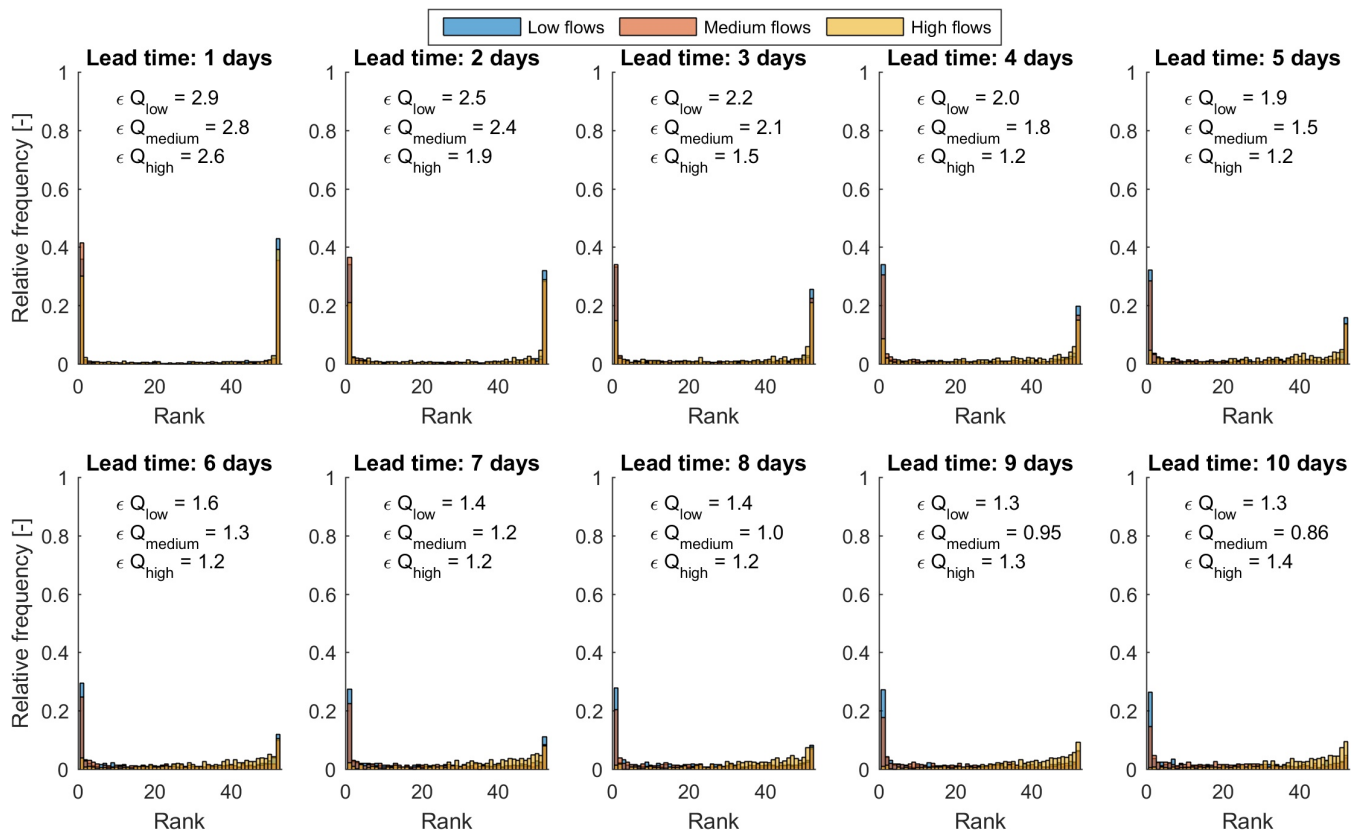

# Supplement Figure 3: Reliability diagrams and histograms of sample size per bin

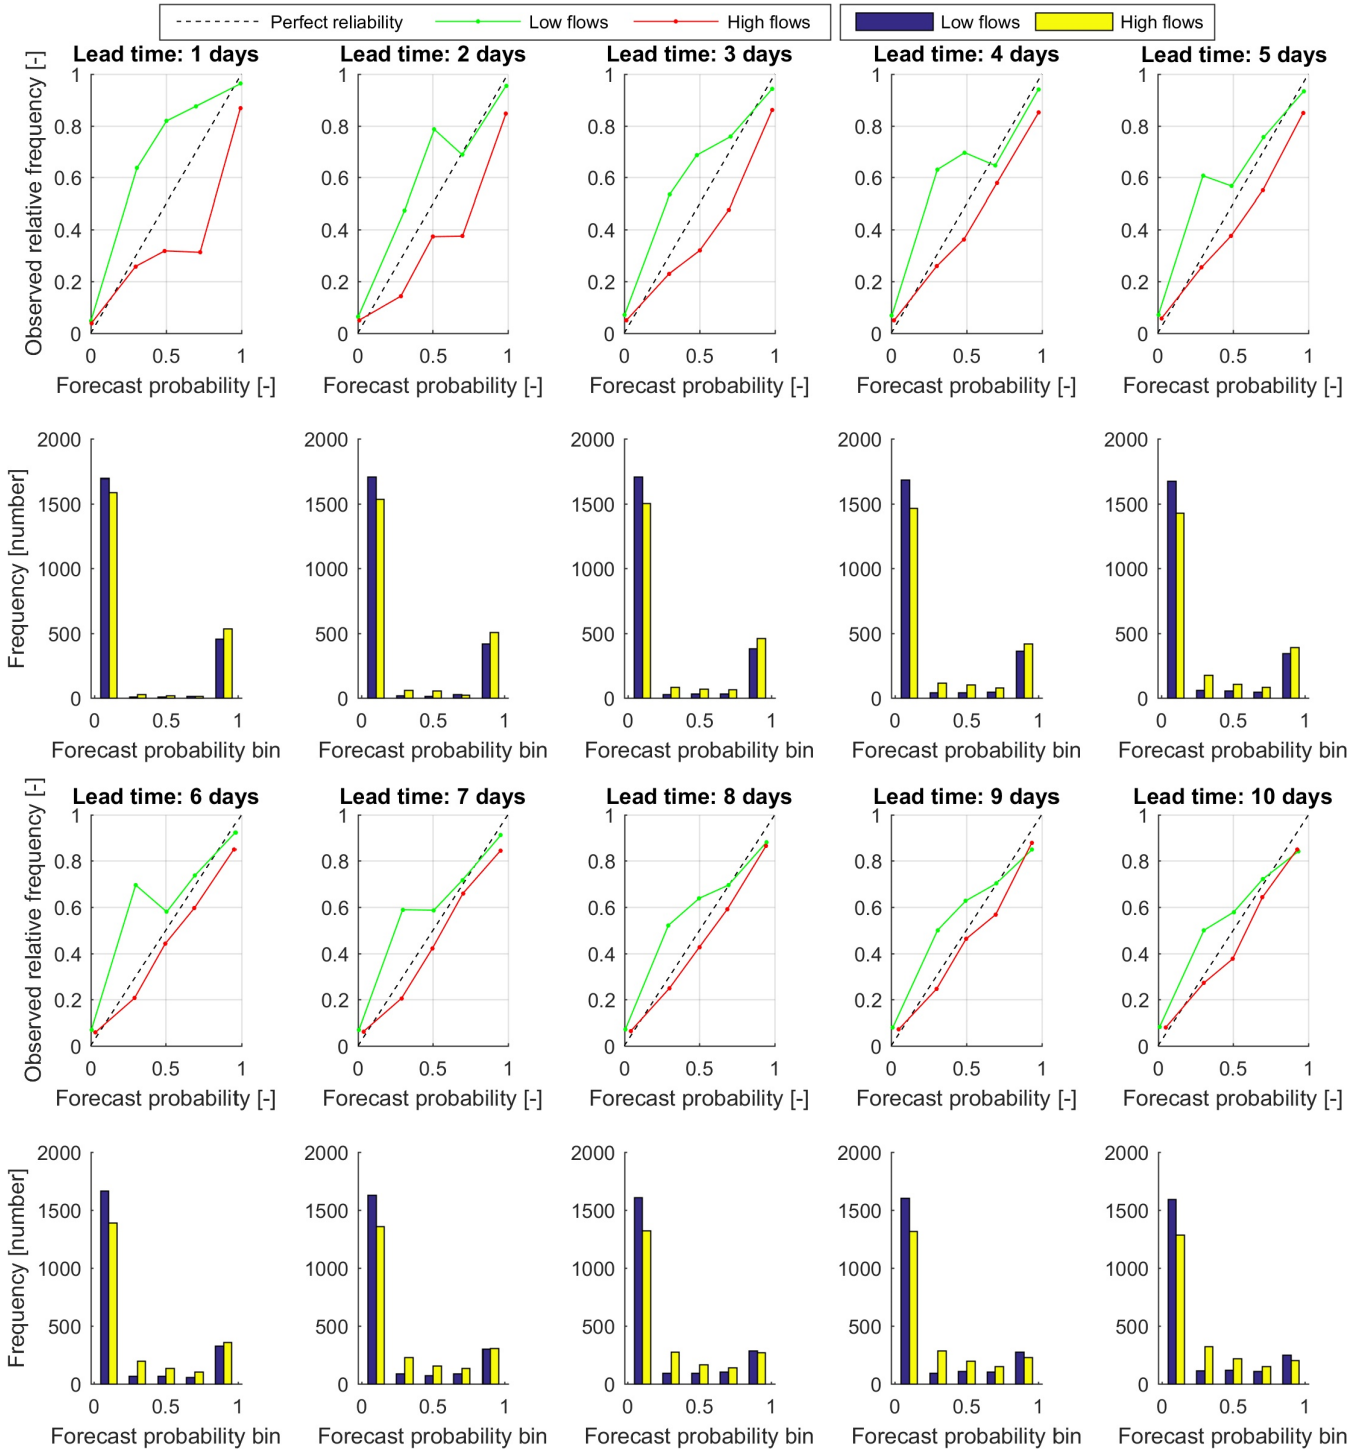

## Supplement Figure 4: Relative operating characteristic curves

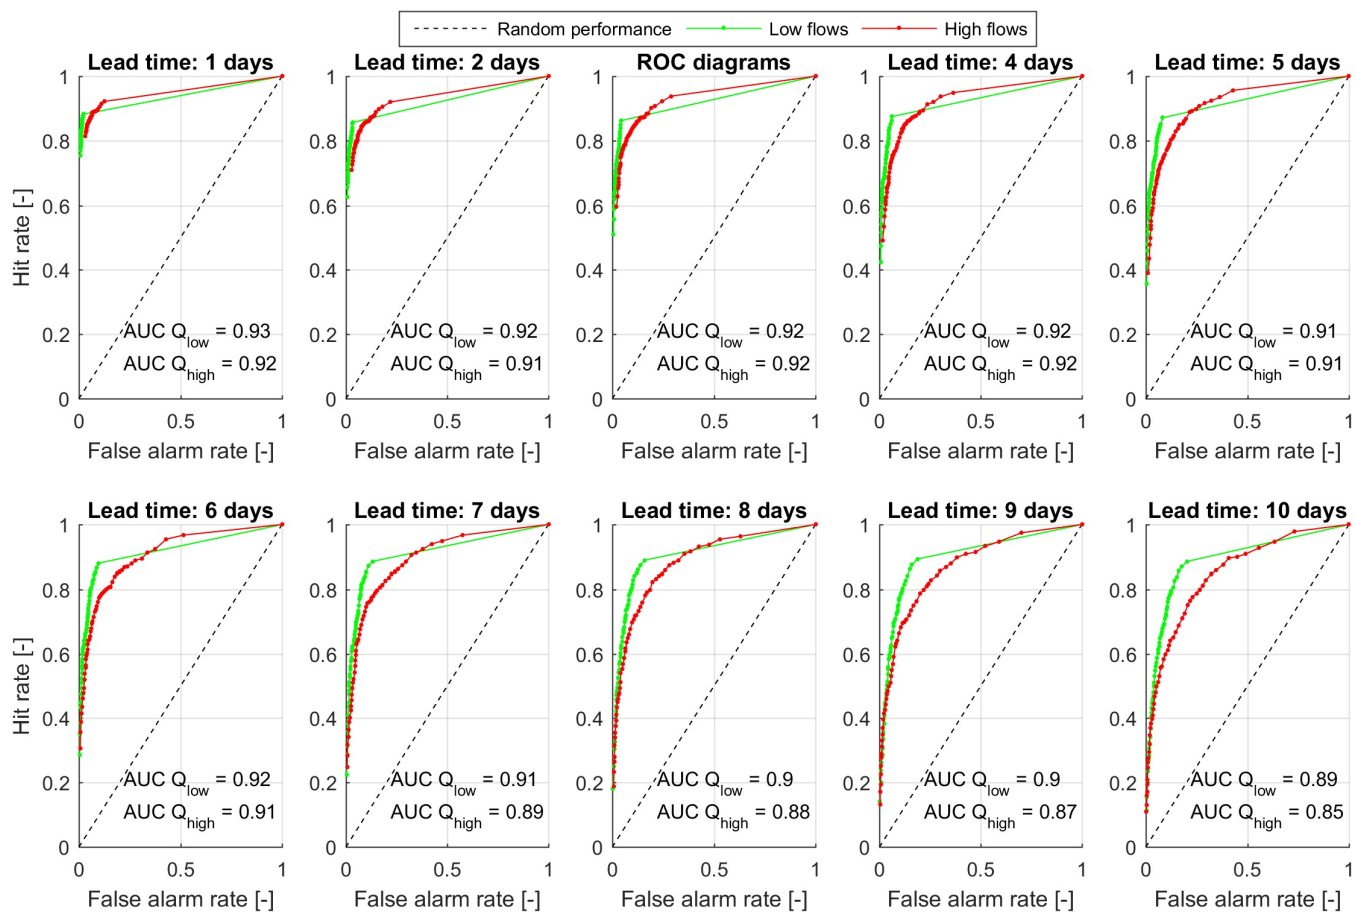

Supplement: Supplementary file 1 [file hess-21-5273-2017-supplement.pdf]
